# Supplementary material for: Loss of Elp1 disrupts trigeminal ganglion neurodevelopment in a model of familial dysautonomia
Source: eLife. 2022 Jun 17;11:e71455. doi: 10.7554/eLife.71455 (PMC9273214; doi:10.7554/eLife.71455)
Supplement: Figure 2—source data 1. [file elife-71455-fig2-data1.xlsx]

## Sheet: Size TG
Control	Elp1 CKO			Control	Elp1 CKO
899	858		average	885.333	892.667
906	877		stdev	29.9388	44.6132
851	943		n	3	3
			sqrt n	1.73205	1.73205
			sem	17.2852	25.7574

## Sheet: OpV Length
Control	Elp1 CKO			Control	Elp1 CKO
651	571		average	618.667	569
610	580		stdev	28.9885	12.1244
595	556		n	3	3
			sqrt n	1.73205	1.73205
			sem	16.7365	7

## Sheet: MnV Length
Control	Elp1 CKO			Control	Elp1 CKO
863	902		average	896.333	905
965	936		stdev	59.4755	29.6142
861	877		n	3	3
			sqrt n	1.73205	1.73205
			sem	34.3382	17.0978

## Sheet: Size GG
Control	Elp1 CKO			Control	Elp1 CKO
416	334		average	387.667	361
351	336		stdev	33.2916	45.0444
396	413		n	3	3
			sqrt n	1.73205	1.73205
			sem	19.2209	26.0064

## Sheet: CT Length
Control	Elp1 CKO			Control	Elp1 CKO
681	709		average	692.333	686.333
721	683		stdev	25.0067	21.1975
675	667		n	3	3
			sqrt n	1.73205	1.73205
			sem	14.4376	12.2384

## Sheet: Sox10 Isl1 Ratio
	Cont			CKO
	1	2	3	1	2	3
	1.01775	1.47674	1.36372	1.10646	1.19577	0.764706
	0.807339	1.14433	1.17808	0.872024	1.23013	1.2518
	0.828829	1.08811	1.26693	1.25069	1.07473	1.33333
	0.914414	1.04681	1.11379	1.01675	1.39175	0.819672
	0.728432	1.0487	1.01911	1.20334
		0.897351	1.18456	1.275
		0.908257	1.14642
Ind. Average	0.859353	1.08719	1.1818	1.12071	1.22309	1.04238
Group Average	1.04278			1.12873

## Sheet: Sox10 Six1 Ratio
	Cont			CKO
	1	2	3	1	2	3
	1	0.969466	1.31469	1.29605	1.1701	0.569343
	0.82243	1.21311	1.04878	1.04676	0.869231	1.08075
	0.814159	0.968627	1	0.791892	0.888218	1.08333
	0.789883	0.884892	0.955621	0.978448	0.901493	0.669643
		0.944444	0.874317	0.927948	1.02015	0.819549
		0.888525	0.972452	0.970787
		0.883929	1.03955	1.02455
Ind. Average	0.856618	0.964714	1.02934	1.00521	0.969839	0.844523
Group Average	0.950225			0.939856
