# Supplementary material for: Loss of Elp1 disrupts trigeminal ganglion neurodevelopment in a model of familial dysautonomia
Source: eLife. 2022 Jun 17;11:e71455. doi: 10.7554/eLife.71455 (PMC9273214; doi:10.7554/eLife.71455)
Supplement: Figure 3—source data 1. [file elife-71455-fig3-data1.xlsx]

## Sheet: Central Root Diameter
Control	Elp1 CKO			Control	Elp1 CKO
426.95	394.47		average	405.85	427.693
467.07	476.81		stdev	54.5248	43.4099
390.55	411.8		n	4	3
338.83			sqrt n	2	1.73205
			sem	27.2624	25.0627

## Sheet: Size TG
Control	Elp1 CKO			Control	Elp1 CKO
827	825		average	835.5	834.333
830	856		stdev	25.4362	18.8237
872	822		n	4	3
813			sqrt n	2	1.73205
			sem	12.7181	10.8679

## Sheet: Sox10 DAPI Ratio
	Cont			CKO
	1	2	3	1	2	3
	0.531683	0.36826	0.523166	0.45056	0.396907	0.646647
	0.478013	0.328618	0.501	0.639106	0.327406	0.330604
	0.506452	0.294461	0.51714	0.647727	0.454139	0.634906
	0.514098	0.512072	0.533575	0.60101	0.462644	0.364646
	0.520496	0.437071			0.453545	0.577075
Ind. Average	0.510148	0.388096	0.51872	0.584601	0.418928	0.510776
Group Average	0.472322			0.504768

## Sheet: Six1 DAPI Ratio
	Cont			CKO
	1	2	3	1	2	3
	0.78172	0.892247	0.721042	0.619403	0.729282	0.733882
	0.517101	0.690058	0.552632	0.561086	0.778636	0.755374
	0.759771	0.66442	0.55142	0.532274	0.916409	0.63785
	0.674812		0.686	0.79249	0.737705	0.648485
	0.859406			0.749703	0.734444	0.53032
				0.658249	0.635644	0.554717
				0.620112	0.608833	0.515516
				0.493729	0.661631
				0.599747
Ind. Average	0.718562	0.748908	0.627774	0.625199	0.725323	0.625163
Group Average	0.698415			0.658562
