# Supplementary material for: Loss of Elp1 disrupts trigeminal ganglion neurodevelopment in a model of familial dysautonomia
Source: eLife. 2022 Jun 17;11:e71455. doi: 10.7554/eLife.71455 (PMC9273214; doi:10.7554/eLife.71455)
Supplement: Figure 4—source data 1. [file elife-71455-fig4-data1.xlsx]

## Sheet: Size TG
Control	Elp1 CKO			Control	Elp1 CKO
996.388	973.141		average	1009.75	978.126
1020.85	957.345		stdev	12.3863	22.5493
1012.03	1010.2		n	3	4
	971.815		sqrt n	1.73205	2
			sem	7.15125	11.2747

## Sheet: Central Root Diameter
Control	Elp1 CKO			Control	Elp1 CKO
574.408	376.817		average	546.872	396.785
497.634	357.427		stdev	42.7411	36.6778
568.574	439.258		n	3	4
	413.638		sqrt n	1.73205	2
			sem	24.6766	18.3389

## Sheet: E12.5 opV sholl
Radius	#Intersections
	WT B2	WT E2	CKO E4	CKO E8	CKO B5	CKO E3	WT avg	CKO avg
0	4	2	1	2	1	3	3	1.75
5	6	2	1	2	3	3	4	2.25
10	6	2	1	2	3	3	4	2.25
15	8	2	2	2	3	3	5	2.5
20	7	2	2	2	3	3	4.5	2.5
25	7	3	2	2	3	3	5	2.5
30	7	3	2	2	3	3	5	2.5
35	6	3	2	2	3	3	4.5	2.5
40	6	3	3	2	3	3	4.5	2.75
45	6	3	3	2	3	3	4.5	2.75
50	6	3	3	2	3	3	4.5	2.75
55	6	3	3	2	3	3	4.5	2.75
60	4	3	3	2	3	3	3.5	2.75
65	4	3	3	2	3	3	3.5	2.75
70	7	3	3	2	3	3	5	2.75
75	7	3	3	2	3	3	5	2.75
80	7	3	3	2	3	3	5	2.75
85	7	3	3	2	3	3	5	2.75
90	7	3	3	2	3	3	5	2.75
95	9	3	3	2	3	3	6	2.75
100	9	3	3	2	3	4	6	3
105	9	3	3	2	3	4	6	3
110	8	3	3	2	3	4	5.5	3
115	8	3	3	2	3	4	5.5	3
120	8	3	3	2	3	4	5.5	3
125	8	3	3	2	3	4	5.5	3
130	8	3	3	2	3	4	5.5	3
135	8	3	3	2	3	4	5.5	3
140	8	3	3	5	3	4	5.5	3.75
145	8	3	3	3	3	4	5.5	3.25
150	8	3	3	3	3	4	5.5	3.25
155	8	3	3	3	3	4	5.5	3.25
160	8	3	3	3	3	4	5.5	3.25
165	8	3	3	3	3	4	5.5	3.25
170	8	3	3	3	3	4	5.5	3.25
175	8	3	3	3	3	4	5.5	3.25
180	9	3	3	3	3	4	6	3.25
185	9	3	3	3	6	4	6	4
190	9	3	3	3	4	4	6	3.5
195	9	3	3	3	4	4	6	3.5
200	9	3	3	8	4	4	6	4.75
205	9	3	3	4	4	4	6	3.75
210	9	3	3	4	4	4	6	3.75
215	9	3	3	4	4	4	6	3.75
220	9	3	3	4	4	4	6	3.75
225	9	3	3	4	4	4	6	3.75
230	9	3	3	4	4	4	6	3.75
235	9	7	3	4	4	4	8	3.75
240	9	7	4	4	4	4	8	4
245	9	7	5	4	4	4	8	4.25
250	9	7	5	4	4	4	8	4.25
255	9	5	5	4	4	4	7	4.25
260	9	5	5	4	4	4	7	4.25
265	9	5	5	4	4	4	7	4.25
270	9	5	5	4	4	4	7	4.25
275	9	5	5	4	4	4	7	4.25
280	9	5	5	4	4	4	7	4.25
285	9	4	5	4	4	4	6.5	4.25
290	9	4	5	4	4	4	6.5	4.25
295	9	4	5	4	4	3	6.5	4
300	9	4	5	4	4	3	6.5	4
305	9	4	6	4	4	3	6.5	4.25
310	9	4	6	4	4	3	6.5	4.25
315	9	4	8	5	4	3	6.5	5
320	9	4	6	5	4	3	6.5	4.5
325	10	4	6	5	4	3	7	4.5
330	10	4	6	5	4	3	7	4.5
335	10	4	6	5	4	3	7	4.5
340	10	4	6	5	4	3	7	4.5
345	10	4	6	5	4	3	7	4.5
350	10	4	7	5	5	3	7	5
355	11	4	7	5	7	3	7.5	5.5
360	11	4	7	5	5	3	7.5	5
365	11	4	7	5	5	3	7.5	5
370	11	4	7	5	6	3	7.5	5.25
375	11	4	7	5	6	3	7.5	5.25
380	11	4	7	5	6	3	7.5	5.25
385	11	4	7	5	4	4	7.5	5
390	12	4	7	5	4	4	8	5
395	12	4	8	5	4	5	8	5.5
400	12	4	8	5	4	5	8	5.5
405	12	4	8	5	4	5	8	5.5
410	14	4	8	5	4	5	9	5.5
415	16	4	8	5	5	5	10	5.75
420	20	4	8	5	5	5	12	5.75
425	15	4	8	5	5	5	9.5	5.75
430	14	4	8	5	6	5	9	6
435	14	4	8	5	6	5	9	6
440	14	4	9	5	6	5	9	6.25
445	14	4	9	5	6	5	9	6.25
450	14	4	9	5	6	5	9	6.25
455	14	5	9	5	6	6	9.5	6.5
460	14	5	9	5	6	6	9.5	6.5
465	14	11	9	5	6	6	12.5	6.5
470	14	11	9	5	6	6	12.5	6.5
475	14	9	9	5	6	6	11.5	6.5
480	14	5	9	7	6	6	9.5	7
485	14	5	8	7	6	6	9.5	6.75
490	15	5	8	7	6	6	10	6.75
495	15	6	8	5	6	6	10.5	6.25
500	15	6	8	5	5	6	10.5	6
505	15	6	8	5	5	7	10.5	6.25
510	15	6	8	5	5	7	10.5	6.25
515	17	6	8	5	5	7	11.5	6.25
520	15	6	8	5	5	7	10.5	6.25
525	15	6	8	5	5	7	10.5	6.25
530	15	6	8	5	5	7	10.5	6.25
535	15	6	8	5	5	7	10.5	6.25
540	15	6	8	4	5	7	10.5	6
545	15	6	8	4	5	7	10.5	6
550	14	6	8	4	5	7	10	6
555	15	6	8	4	5	7	10.5	6
560	15	6	8	4	5	8	10.5	6.25
565	15	6	8	5	5	8	10.5	6.5
570	15	6	8	5	5	8	10.5	6.5
575	16	6	8	5	5	7	11	6.25
580	15	6	8	5	5	7	10.5	6.25
585	15	6	8	5	5	7	10.5	6.25
590	15	6	8	5	5	7	10.5	6.25
595	15	6	8	5	5	7	10.5	6.25
600	15	7	8	5	5	7	11	6.25
605	15	9	8	5	6	7	12	6.5
610	15	7	8	5	6	7	11	6.5
615	15	7	8	5	6	7	11	6.5
620	15	7	8	5	6	7	11	6.5
625	14	7	7	5	6	7	10.5	6.25
630	14	7	7	5	6	7	10.5	6.25
635	14	7	7	5	6	7	10.5	6.25
640	14	7	7	5	10	7	10.5	7.25
645	14	7	7	6	6	7	10.5	6.5
650	15	7	7	6	6	7	11	6.5
655	15	7	7	6	7	7	11	6.75
660	15	11	7	6	7	7	13	6.75
665	15	8	6	6	7	7	11.5	6.5
670	15	8	6	6	8	7	11.5	6.75
675	15	14	6	6	8	7	14.5	6.75
680	15	10	6	6	9	7	12.5	7
685	15	8	6	6	8	6	11.5	6.5
690	15	7	6	6	8	6	11	6.5
695	15	7	6	6	8	7	11	6.75
700	15	7	6	6	8	7	11	6.75
705	15	7	6	6	8	7	11	6.75
710	15	7	6	7	8	7	11	7
715	15	7	6	7	8	7	11	7
720	15	7	6	7	8	7	11	7
725	14	7	6	7	8	7	10.5	7
730	14	7	6	7	8	7	10.5	7
735	16	7	6	7	8	7	11.5	7
740	15	7	6	7	8	7	11	7
745	15	7	6	7	7	7	11	6.75
750	15	7	6	7	7	6	11	6.5
755	15	7	7	7	7	7	11	7
760	15	7	8	7	6	7	11	7
765	15	7	8	7	6	7	11	7
770	15	7	8	7	6	7	11	7
775	15	7	8	7	6	7	11	7
780	15	7	8	7	6	7	11	7
785	15	7	8	7	6	7	11	7
790	15	7	8	6	6	7	11	6.75
795	15	7	8	6	6	7	11	6.75
800	15	7	8	6	6	8	11	7
805	15	8	11	6	6	8	11.5	7.75
810	15	8	9	5	7	8	11.5	7.25
815	15	8	11	5	7	8	11.5	7.75
820	15	8	7	5	7	8	11.5	6.75
825	14	9	7	5	7	9	11.5	7
830	14	9	7	5	7	8	11.5	6.75
835	14	9	8	5	7	8	11.5	7
840	14	9	8	6	7	8	11.5	7.25
845	14	9	10	7	7	8	11.5	8
850	14	10	8	7	7	8	12	7.5
855	14	10	8	7	6	8	12	7.25
860	15	10	8	7	6	8	12.5	7.25
865	15	13	8	7	6	8	14	7.25
870	15	9	7	7	6	12	12	8
875	15	9	7	7	6	10	12	7.5
880	15	12	6	7	6	10	13.5	7.25
885	15	10	6	9	6	10	12.5	7.75
890	15	10	6	9	6	8	12.5	7.25
895	14	11	5	8	6	8	12.5	6.75
900	14	13	5	8	6	8	13.5	6.75
905	14	11	6	8	6	8	12.5	7
910	15	11	6	6	6	8	13	6.5
915	15	12	6	6	5	8	13.5	6.25
920	18	12	6	6	5	8	15	6.25
925	15	12	6	6	5	8	13.5	6.25
930	15	12	6	7	5	8	13.5	6.5
935	15	12	6	7	5	8	13.5	6.5
940	15	12	7	7	5	8	13.5	6.75
945	15	16	7	7	5	9	15.5	7
950	14	12	7	6	5	9	13	6.75
955	14	13	7	5	5	9	13.5	6.5
960	14	13	7	5	5	9	13.5	6.5
965	14	13	8	5	5	8	13.5	6.5
970	14	15	7	5	5	10	14.5	6.75
975	13	15	7	5	5	8	14	6.25
980	12	13	7	5	5	8	12.5	6.25
985	12	13	7	4	5	9	12.5	6.25
990	12	15	8	4	5	9	13.5	6.5
995	12	14	8	4	5	9	13	6.5
1000	15	12	8	4	5	9	13.5	6.5
1005	13	12	8	4	5	9	12.5	6.5
1010	14	12	8	4	5	9	13	6.5
1015	13	12	8	4	5	9	12.5	6.5
1020	13	12	8	4	5	8	12.5	6.25
1025	13	13	8	4	5	8	13	6.25
1030	14	14	8	4	5	8	14	6.25
1035	14	14	8	4	5	8	14	6.25
1040	14	14	9	6	5	8	14	7
1045	16	16	7	6	5	8	16	6.5
1050	14	15	7	6	5	9	14.5	6.75
1055	15	15	7	8	5	9	15	7.25
1060	15	15	7	8	5	9	15	7.25
1065	14	15	7	7	5	10	14.5	7.25
1070	14	15	7	7	5	10	14.5	7.25
1075	14	15	7	9	5	10	14.5	7.75
1080	14	15	10	7	5	10	14.5	8
1085	14	17	8	7	5	10	15.5	7.5
1090	14	19	10	7	6	10	16.5	8.25
1095	14	15	10	9	4	11	14.5	8.5
1100	14	15	8	7	4	11	14.5	7.5
1105	14	15	10	7	4	11	14.5	8
1110	14	16	8	7	4	12	15	7.75
1115	14	14	8	7	4	12	14	7.75
1120	14	14	10	7	4	13	14	8.5
1125	14	14	10	7	4	13	14	8.5
1130	14	14	11	7	4	13	14	8.75
1135	14	14	9	6	6	14	14	8.75
1140	14	14	9	5	6	14	14	8.5
1145	14	14	9	5	6	14	14	8.5
1150	15	14	9	5	8	14	14.5	9
1155	14	14	9	5	6	18	14	9.5
1160	14	15	9	7	6	15	14.5	9.25
1165	14	15	9	5	7	17	14.5	9.5
1170	15	15	9	5	7	17	15	9.5
1175	15	15	8	5	7	17	15	9.25
1180	15	15	8	5	7	18	15	9.5
1185	15	15	8	4	7	14	15	8.25
1190	15	15	8	4	7	12	15	7.75
1195	15	15	8	4	7	12	15	7.75
1200	13	15	9	4	7	12	14	8
1205	13	14	9	4	7	12	13.5	8
1210	13	14	9	4	7	17	13.5	9.25
1215	13	15	9	4	7	15	14	8.75
1220	13	15	9	4	7	15	14	8.75
1225	13	15	9	3	7	17	14	9
1230	13	15	9	2	7	17	14	8.75
1235	13	15	10	2	7	18	14	9.25
1240	14	15	10	2	7	16	14.5	8.75
1245	15	15	10	2	7	18	15	9.25
1250	15	15	10	2	7	15	15	8.5
1255	15	15	10	2	7	16	15	8.75
1260	14	15	10	2	7	16	14.5	8.75
1265	14	15	10	2	7	15	14.5	8.5
1270	14	15	10	2	7	14	14.5	8.25
1275	14	15	11	2	7	15	14.5	8.75
1280	14	15	11	2	7	15	14.5	8.75
1285	14	15	11	2	7	15	14.5	8.75
1290	13	14	11	2	8	15	13.5	9
1295	13	14	11	2	7	15	13.5	8.75
1300	13	15	12	2	7	15	14	9
1305	13	15	12	2	8	15	14	9.25
1310	13	15	12	2	8	16	14	9.5
1315	12	16	12	2	8	17	14	9.75
1320	12	16	14	2	9	17	14	10.5
1325	12	16	10	2	9	17	14	9.5
1330	12	18	10	2	9	17	15	9.5
1335	12	18	10	2	9	17	15	9.5
1340	11	20	10	2	8	17	15.5	9.25
1345	11	17	9	2	7	17	14	8.75
1350	11	16	8	2	7	16	13.5	8.25
1355	11	16	7	2	7	16	13.5	8
1360	11	16	7	2	7	16	13.5	8
1365	11	16	7	2	7	16	13.5	8
1370	11	16	7	2	7	16	13.5	8
1375	11	16	7	2	7	16	13.5	8
1380	11	16	7	2	8	16	13.5	8.25
1385	11	16	7	2	8	15	13.5	8
1390	11	16	6	2	8	15	13.5	7.75
1395	11	16	6	2	8	15	13.5	7.75
1400	11	16	6	2	8	15	13.5	7.75
1405	11	16	6	2	7	15	13.5	7.5
1410	11	16	6	1	7	15	13.5	7.25
1415	12	16	7	1	7	14	14	7.25
1420	12	16	7	1	7	13	14	7
1425	12	16	7	1	7	14	14	7.25
1430	12	16	9	1	8	14	14	8
1435	12	16	6	1	7	14	14	7
1440	13	16	6	1	9	14	14.5	7.5
1445	13	16	6	1	9	14	14.5	7.5
1450	13	16	6	1	13	14	14.5	8.5
1455	13	16	6	1	11	14	14.5	8
1460	13	16	6	1	9	13	14.5	7.25
1465	12	16	6	1	11	13	14	7.75
1470	12	19	6	1	9	12	15.5	7
1475	12	19	6	1	9	12	15.5	7
1480	12	20	6	0	8	12	16	6.5
1485	12	18	6	0	6	12	15	6
1490	12	18	6	0	6	12	15	6
1495	12	18	6	0	6	12	15	6
1500	12	18	6	0	7	12	15	6.25
1505	12	18	6	0	8	12	15	6.5
1510	12	21	5	0	8	12	16.5	6.25
1515	12	17	5	0	8	12	14.5	6.25
1520	12	17	5	0	8	12	14.5	6.25
1525	12	17	5	0	10	11	14.5	6.5
1530	12	18	5	0	10	11	15	6.5
1535	12	19	5	0	14	11	15.5	7.5
1540	12	19	5	0	8	11	15.5	6
1545	12	19	5	0	7	11	15.5	5.75
1550	12	19	5	0	5	11	15.5	5.25
1555	12	17	5	0	5	11	14.5	5.25
1560	14	17	5	0	4	12	15.5	5.25
1565	14	17	5	0	5	12	15.5	5.5
1570	14	19	5	0	5	12	16.5	5.5
1575	14	18	5	0	5	12	16	5.5
1580	14	18	5	0	5	12	16	5.5
1585	14	18	7	0	4	14	16	6.25
1590	14	19	5	0	4	12	16.5	5.25
1595	14	17	5	0	4	11	15.5	5
1600	14	15	5	0	4	11	14.5	5
1605	14	15	5	0	4	11	14.5	5
1610	14	15	5	0	4	11	14.5	5
1615	14	15	5	0	4	11	14.5	5
1620	14	15	5	0	4	11	14.5	5
1625	14	15	5	0	5	11	14.5	5.25
1630	14	15	5	0	5	11	14.5	5.25
1635	14	17	5	0	5	11	15.5	5.25
1640	14	14	5	0	5	11	14	5.25
1645	13	13	5	0	5	10	13	5
1650	14	13	5	0	7	10	13.5	5.5
1655	14	13	5	0	5	10	13.5	5
1660	16	13	6	0	5	10	14.5	5.25
1665	13	13	6	0	5	9	13	5
1670	13	15	6	0	7	9	14	5.5
1675	13	16	6	0	5	9	14.5	5
1680	12	16	5	0	7	9	14	5.25
1685	11	16	5	0	5	9	13.5	4.75
1690	11	16	5	0	5	9	13.5	4.75
1695	11	18	5	0	5	9	14.5	4.75
1700	11	16	5	0	5	9	13.5	4.75
1705	11	17	5	0	5	9	14	4.75
1710	11	19	5	0	5	9	15	4.75
1715	11	17	5	0	6	8	14	4.75
1720	11	19	5	0	6	8	15	4.75
1725	10	15	5	0	6	8	12.5	4.75
1730	10	14	5	0	6	8	12	4.75
1735	10	14	5	0	6	8	12	4.75
1740	10	14	5	0	6	8	12	4.75
1745	10	14	5	0	6	8	12	4.75
1750	10	14	5	0	5	8	12	4.5
1755	10	14	5	0	5	8	12	4.5
1760	10	14	5	0	5	8	12	4.5
1765	10	14	5	0	5	8	12	4.5
1770	10	14	5	0	5	8	12	4.5
1775	10	13	5	0	5	8	11.5	4.5
1780	10	13	4	0	5	7	11.5	4
1785	10	13	3	0	5	7	11.5	3.75
1790	10	13	3	0	5	7	11.5	3.75
1795	10	12	3	0	5	6	11	3.5
1800	10	12	3	0	5	6	11	3.5
1805	9	12	3	0	5	6	10.5	3.5
1810	9	12	3	0	5	6	10.5	3.5
1815	9	13	3	0	5	6	11	3.5
1820	9	13	3	0	5	6	11	3.5
1825	10	13	3	0	5	6	11.5	3.5
1830	9	13	3	0	5	6	11	3.5
1835	9	13	3	0	6	6	11	3.75
1840	9	13	3	0	6	6	11	3.75
1845	9	13	3	0	6	5	11	3.5
1850	9	13	3	0	6	4	11	3.25
1855	9	13	3	0	6	4	11	3.25
1860	9	13	2	0	6	4	11	3
1865	9	13	2	0	6	4	11	3
1870	9	13	2	0	6	4	11	3
1875	9	13	2	0	6	4	11	3
1880	9	13	2	0	6	4	11	3
1885	9	13	2	0	6	4	11	3
1890	11	12	1	0	6	4	11.5	2.75
1895	10	13	1	0	6	4	11.5	2.75
1900	10	13	1	0	6	4	11.5	2.75
1905	11	13	1	0	10	4	12	3.75
1910	11	13	1	0	6	4	12	2.75
1915	11	13	1	0	6	4	12	2.75
1920	12	13	1	0	6	4	12.5	2.75
1925	12	13	0	0	5	4	12.5	2.25
1930	12	13	0	0	5	4	12.5	2.25
1935	11	13	0	0	5	4	12	2.25
1940	12	13	0	0	5	4	12.5	2.25
1945	16	13	0	0	5	3	14.5	2
1950	11	13	0	0	5	3	12	2
1955	11	14	0	0	5	3	12.5	2
1960	11	14	0	0	5	3	12.5	2
1965	11	14	0	0	5	3	12.5	2
1970	11	14	0	0	5	3	12.5	2
1975	11	14	0	0	5	3	12.5	2
1980	11	14	0	0	5	3	12.5	2
1985	11	14	0	0	5	3	12.5	2
1990	11	14	0	0	6	3	12.5	2.25
1995	11	14	0	0	7	4	12.5	2.75
2000	11	14	0	0	7	2	12.5	2.25
2005	11	14	0	0	7	2	12.5	2.25
2010	11	14	0	0	7	2	12.5	2.25
2015	12	14	0	0	7	2	13	2.25
2020	10	14	0	0	7	2	12	2.25
2025	10	14	0	0	7	1	12	2
2030	10	14	0	0	7	1	12	2
2035	10	14	0	0	7	1	12	2
2040	10	14	0	0	7	0	12	1.75
2045	9	14	0	0	6	0	11.5	1.5
2050	9	14	0	0	6	0	11.5	1.5
2055	9	14	0	0	6	0	11.5	1.5
2060	9	14	0	0	6	0	11.5	1.5
2065	9	14	0	0	6	0	11.5	1.5
2070	9	14	0	0	6	0	11.5	1.5
2075	9	14	0	0	6	0	11.5	1.5
2080	9	14	0	0	6	0	11.5	1.5
2085	9	14	0	0	6	0	11.5	1.5
2090	9	14	0	0	6	0	11.5	1.5
2095	9	14	0	0	6	0	11.5	1.5
2100	9	13	0	0	6	0	11	1.5
2105	9	13	0	0	6	0	11	1.5
2110	9	13	0	0	5	0	11	1.25
2115	9	13	0	0	5	0	11	1.25
2120	9	13	0	0	5	0	11	1.25
2125	8	13	0	0	5	0	10.5	1.25
2130	7	13	0	0	5	0	10	1.25
2135	7	13	0	0	5	0	10	1.25
2140	7	13	0	0	4	0	10	1
2145	7	13	0	0	4	0	10	1
2150	8	12	0	0	4	0	10	1
2155	8	11	0	0	3	0	9.5	0.75
2160	8	11	0	0	3	0	9.5	0.75
2165	8	10	0	0	2	0	9	0.5
2170	8	10	0	0	1	0	9	0.25
2175	8	10	0	0	1	0	9	0.25
2180	7	11	0	0	1	0	9	0.25
2185	7	11	0	0	1	0	9	0.25
2190	7	11	0	0	1	0	9	0.25
2195	6	12	0	0	1	0	9	0.25
2200	6	12	0	0	1	0	9	0.25
2205	6	12	0	0	1	0	9	0.25
2210	6	12	0	0	1	0	9	0.25
2215	6	12	0	0	1	0	9	0.25
2220	6	12	0	0	0	0	9	0
2225	6	12	0	0	0	0	9	0
2230	6	12	0	0	0	0	9	0
2235	6	12	0	0	0	0	9	0
2240	6	12	0	0	0	0	9	0
2245	6	12	0	0	0	0	9	0
2250	5	12	0	0	0	0	8.5	0
2255	5	12	0	0	0	0	8.5	0
2260	5	12	0	0	0	0	8.5	0
2265	5	12	0	0	0	0	8.5	0
2270	5	12	0	0	0	0	8.5	0
2275	5	12	0	0	0	0	8.5	0
2280	5	12	0	0	0	0	8.5	0
2285	5	12	0	0	0	0	8.5	0
2290	5	12	0	0	0	0	8.5	0
2295	5	12	0	0	0	0	8.5	0
2300	5	12	0	0	0	0	8.5	0
2305	5	12	0	0	0	0	8.5	0
2310	5	12	0	0	0	0	8.5	0
2315	5	12	0	0	0	0	8.5	0
2320	5	11	0	0	0	0	8	0
2325	5	11	0	0	0	0	8	0
2330	5	11	0	0	0	0	8	0
2335	5	11	0	0	0	0	8	0
2340	5	11	0	0	0	0	8	0
2345	5	11	0	0	0	0	8	0
2350	5	11	0	0	0	0	8	0
2355	5	10	0	0	0	0	7.5	0
2360	5	10	0	0	0	0	7.5	0
2365	5	10	0	0	0	0	7.5	0
2370	5	10	0	0	0	0	7.5	0
2375	5	10	0	0	0	0	7.5	0
2380	5	10	0	0	0	0	7.5	0
2385	5	10	0	0	0	0	7.5	0
2390	6	10	0	0	0	0	8	0
2395	6	10	0	0	0	0	8	0
2400	6	10	0	0	0	0	8	0
2405	6	10	0	0	0	0	8	0
2410	6	10	0	0	0	0	8	0
2415	6	9	0	0	0	0	7.5	0
2420	6	9	0	0	0	0	7.5	0
2425	9	9	0	0	0	0	9	0
2430	7	9	0	0	0	0	8	0
2435	7	9	0	0	0	0	8	0
2440	7	9	0	0	0	0	8	0
2445	7	9	0	0	0	0	8	0
2450	7	8	0	0	0	0	7.5	0
2455	6	8	0	0	0	0	7	0
2460	6	8	0	0	0	0	7	0
2465	6	7	0	0	0	0	6.5	0
2470	6	7	0	0	0	0	6.5	0
2475	6	7	0	0	0	0	6.5	0
2480	6	7	0	0	0	0	6.5	0
2485	6	6	0	0	0	0	6	0
2490	6	6	0	0	0	0	6	0
2495	6	6	0	0	0	0	6	0
2500	6	5	0	0	0	0	5.5	0
2505	6	5	0	0	0	0	5.5	0
2510	6	5	0	0	0	0	5.5	0
2515	6	5	0	0	0	0	5.5	0
2520	6	5	0	0	0	0	5.5	0
2525	6	5	0	0	0	0	5.5	0
2530	6	5	0	0	0	0	5.5	0
2535	6	5	0	0	0	0	5.5	0
2540	6	5	0	0	0	0	5.5	0
2545	6	5	0	0	0	0	5.5	0
2550	6	5	0	0	0	0	5.5	0
2555	6	5	0	0	0	0	5.5	0
2560	6	5	0	0	0	0	5.5	0
2565	5	5	0	0	0	0	5	0
2570	5	5	0	0	0	0	5	0
2575	5	5	0	0	0	0	5	0
2580	5	5	0	0	0	0	5	0
2585	5	5	0	0	0	0	5	0
2590	5	5	0	0	0	0	5	0
2595	5	4	0	0	0	0	4.5	0
2600	5	4	0	0	0	0	4.5	0
2605	5	4	0	0	0	0	4.5	0
2610	5	4	0	0	0	0	4.5	0
2615	5	4	0	0	0	0	4.5	0
2620	5	4	0	0	0	0	4.5	0
2625	5	4	0	0	0	0	4.5	0
2630	5	4	0	0	0	0	4.5	0
2635	5	4	0	0	0	0	4.5	0
2640	5	4	0	0	0	0	4.5	0
2645	5	4	0	0	0	0	4.5	0
2650	5	4	0	0	0	0	4.5	0
2655	5	4	0	0	0	0	4.5	0
2660	5	4	0	0	0	0	4.5	0
2665	5	4	0	0	0	0	4.5	0
2670	5	4	0	0	0	0	4.5	0
2675	5	4	0	0	0	0	4.5	0
2680	5	4	0	0	0	0	4.5	0
2685	5	4	0	0	0	0	4.5	0
2690	5	4	0	0	0	0	4.5	0
2695	5	4	0	0	0	0	4.5	0
2700	5	4	0	0	0	0	4.5	0
2705	5	4	0	0	0	0	4.5	0
2710	5	4	0	0	0	0	4.5	0
2715	5	4	0	0	0	0	4.5	0
2720	5	4	0	0	0	0	4.5	0
2725	5	4	0	0	0	0	4.5	0
2730	5	4	0	0	0	0	4.5	0
2735	5	4	0	0	0	0	4.5	0
2740	5	4	0	0	0	0	4.5	0
2745	5	4	0	0	0	0	4.5	0
2750	5	4	0	0	0	0	4.5	0
2755	5	4	0	0	0	0	4.5	0
2760	5	4	0	0	0	0	4.5	0
2765	5	4	0	0	0	0	4.5	0
2770	5	4	0	0	0	0	4.5	0
2775	5	4	0	0	0	0	4.5	0
2780	5	4	0	0	0	0	4.5	0
2785	5	4	0	0	0	0	4.5	0
2790	5	4	0	0	0	0	4.5	0
2795	5	4	0	0	0	0	4.5	0
2800	5	4	0	0	0	0	4.5	0
2805	5	4	0	0	0	0	4.5	0
2810	4	4	0	0	0	0	4	0
2815	4	4	0	0	0	0	4	0
2820	4	4	0	0	0	0	4	0
2825	4	4	0	0	0	0	4	0
2830	4	4	0	0	0	0	4	0
2835	4	4	0	0	0	0	4	0
2840	4	4	0	0	0	0	4	0
2845	4	4	0	0	0	0	4	0
2850	4	4	0	0	0	0	4	0
2855	3	4	0	0	0	0	3.5	0
2860	2	4	0	0	0	0	3	0
2865	2	4	0	0	0	0	3	0
2870	2	4	0	0	0	0	3	0
2875	2	4	0	0	0	0	3	0
2880	2	4	0	0	0	0	3	0
2885	2	3	0	0	0	0	2.5	0
2890	2	3	0	0	0	0	2.5	0
2895	2	3	0	0	0	0	2.5	0
2900	2	3	0	0	0	0	2.5	0
2905	2	3	0	0	0	0	2.5	0
2910	2	3	0	0	0	0	2.5	0
2915	2	3	0	0	0	0	2.5	0
2920	2	3	0	0	0	0	2.5	0
2925	2	3	0	0	0	0	2.5	0
2930	2	3	0	0	0	0	2.5	0
2935	2	3	0	0	0	0	2.5	0
2940	2	3	0	0	0	0	2.5	0
2945	2	3	0	0	0	0	2.5	0
2950	2	3	0	0	0	0	2.5	0
2955	2	3	0	0	0	0	2.5	0
2960	2	3	0	0	0	0	2.5	0
2965	2	3	0	0	0	0	2.5	0
2970	2	3	0	0	0	0	2.5	0
2975	2	3	0	0	0	0	2.5	0
2980	2	3	0	0	0	0	2.5	0
2985	2	3	0	0	0	0	2.5	0
2990	2	3	0	0	0	0	2.5	0
2995	2	3	0	0	0	0	2.5	0
3000	2	3	0	0	0	0	2.5	0
3005	2	3	0	0	0	0	2.5	0
3010	2	3	0	0	0	0	2.5	0
3015	2	3	0	0	0	0	2.5	0
3020	2	3	0	0	0	0	2.5	0
3025	2	3	0	0	0	0	2.5	0
3030	2	3	0	0	0	0	2.5	0
3035	2	3	0	0	0	0	2.5	0
3040	2	3	0	0	0	0	2.5	0
3045	2	3	0	0	0	0	2.5	0
3050	2	3	0	0	0	0	2.5	0
3055	2	3	0	0	0	0	2.5	0
3060	2	3	0	0	0	0	2.5	0
3065	2	3	0	0	0	0	2.5	0
3070	2	3	0	0	0	0	2.5	0
3075	2	3	0	0	0	0	2.5	0
3080	2	3	0	0	0	0	2.5	0
3085	1	3	0	0	0	0	2	0
3090	1	3	0	0	0	0	2	0
3095	1	3	0	0	0	0	2	0
3100	1	3	0	0	0	0	2	0
3105	1	3	0	0	0	0	2	0
3110	1	3	0	0	0	0	2	0
3115	1	3	0	0	0	0	2	0
3120	1	3	0	0	0	0	2	0
3125	1	3	0	0	0	0	2	0
3130	1	3	0	0	0	0	2	0
3135	1	3	0	0	0	0	2	0
3140	1	3	0	0	0	0	2	0
3145	1	3	0	0	0	0	2	0
3150	1	3	0	0	0	0	2	0
3155	1	3	0	0	0	0	2	0
3160	1	3	0	0	0	0	2	0
3165	1	3	0	0	0	0	2	0
3170	1	2	0	0	0	0	1.5	0
3175	1	2	0	0	0	0	1.5	0
3180	1	1	0	0	0	0	1	0
3185	1	1	0	0	0	0	1	0
3190	1	1	0	0	0	0	1	0
3195	1	1	0	0	0	0	1	0
3200	1	1	0	0	0	0	1	0
3205	1	1	0	0	0	0	1	0
3210	1	1	0	0	0	0	1	0
3215	1	1	0	0	0	0	1	0
3220	1	1	0	0	0	0	1	0
3225	1	1	0	0	0	0	1	0
3230	1	1	0	0	0	0	1	0
		1
		1
		1
		1
		1

## Sheet: Io Nerve Extent
Control	Elp1 CKO			Control	Elp1 CKO
9742	6795		average	9374.33	7061
9053	6673		stdev	346.829	383.308
9328	7441		n	3	4
	7335		sqrt n	1.73205	2
			sem	200.242	191.654
