# Supplementary material for: Loss of Elp1 disrupts trigeminal ganglion neurodevelopment in a model of familial dysautonomia
Source: eLife. 2022 Jun 17;11:e71455. doi: 10.7554/eLife.71455 (PMC9273214; doi:10.7554/eLife.71455)
Supplement: Figure 5—source data 1. [file elife-71455-fig5-data1.xlsx]

## Sheet: Normalized Trk Fluorescence
	Control TrkA+			Control TrkB+			Control TrkC+			Elp1 CKO TrkA+			Elp1 CKO TrkB+			Elp1 CKO TrkC+
	1	2	3	1	2	3	1	2	3	1	2	3	1	2	3	1	2	3
	0.830456	0.47702	0.816937	0.256478	0.238842	0.209494	0.156312	0.305598	0.154214	0.656911	0.537791	0.550212	0.318702	0.416754	0.235551	0.145661	0.236533	0.166336
	1.07903	0.741561	0.945476	0.327191	0.344928	0.238642	0.131904	0.235628	0.240806	0.655662	0.510101	0.644521	0.398193	0.373326	0.265717	0.201197	0.257834	0.181865
	1.01016	0.678552	0.864115	0.329831	0.466937	0.254223	0.120379	0.336135	0.208048	0.681187	0.578997	0.78663	0.363812	0.185829	0.319408	0.33686	0.343821	0.219284
	0.806165	0.509369	0.755144	0.391451	0.310583	0.322307	0.192571	0.482107	0.244505	0.703716	0.561908	0.547321	0.43509	0.232497	0.238222	0.202641	0.269711	0.261146
	0.857286	0.655171	0.794108	0.524156	0.459394	0.193654	0.186956	0.528265	0.259748	0.611968	0.507408	0.432957	0.426239	0.189916	0.253298	0.240296	0.459537	0.283802
	0.841592	0.684976	1.28751	0.503969	0.383136	0.315199	0.208414	0.512616	0.261462	0.844565	0.730446	0.643395	0.408135	1.08485	0.212684	0.254335	0.473013	0.309479
	1.10221	0.82973	0.807182	0.65335	0.328546	0.440851	0.314637	0.543265	0.262626	0.55894	0.426833	0.53169	0.359041	0.208875	0.311745	0.231843	0.376947	0.247217
	0.783849	0.864563	1.14188	0.380985	0.942422	0.383618	0.281005	0.353356	0.2226	0.624623	0.505248	0.502214	0.328743	0.311436	0.235346	0.245908	0.383342	0.235781
	0.751293	1.29171	1.15771	0.369594	0.327362	0.369216	0.270823	0.260432	0.235582	0.601528	0.609576	0.526228	0.27491	0.236158	0.246582	0.245104	0.339463	0.236578
	0.772176	1.29395	0.908246	0.388799	0.267838	0.293081	0.257837	0.522784	0.306061	0.677689	0.676153	0.438485	0.268484	0.296841	0.205989	0.225046	0.415265	0.20002
	1.07556	0.969598	0.880706	0.290904	0.20481	0.279197	0.191272	0.374549	0.221406	0.625286	0.457399	0.668195	0.326509	0.442214	0.230091	0.207215	0.375614	0.246758
	0.789682	0.601683	1.09493	0.297455	0.340136	0.21101	0.205893	0.450812	0.274555	0.688511	0.597016	0.620491	0.260329		0.2718	0.275567	0.424539	0.263464
	0.968528	0.685851	0.794409	0.224916	0.297122	0.236443	0.131002	0.476682	0.351401	0.681084	0.639608	0.766012	0.294476		0.2092	0.253903	0.268491	0.299908
	0.86831	0.756385	0.9122	0.173729	0.38807	0.214428	0.173232	0.436654	0.245311	0.6987		0.687971	0.335881		0.327242	0.27988	0.431002	0.280444
	0.851596	0.592916	1.10702	0.231457	0.512607	0.33618	0.174953	0.489883	0.265606	0.677268			0.298271		0.25659	0.178443	0.403171	0.219526
	1.33711	0.756978	1.11336	0.389095		0.290292	0.210513	0.630907	0.261525	0.52116					0.722507		0.245533
	0.82275	0.729617		0.357993		0.275747	0.234932	0.452778	0.215502	0.331957
		1.61543		0.57108		0.381468	0.300242	0.504614	0.258707
				0.346962		0.390861	0.244834	0.445369	0.320391
				0.654213		0.351629	0.235326	0.788593	0.179125
									0.186873
Ind. Average	0.914574	0.818614	0.961308	0.38318	0.387516	0.299377	0.211152	0.456551	0.246479	0.637691	0.564499	0.596166	0.339788	0.3617	0.283873	0.234927	0.356488	0.243441
Group Average	0.898165			0.356691			0.304727			0.599452			0.328453			0.278285

## Sheet: Trk Neuron Counts
	TrkA
	Control				Elp1 CKO
	1	2	3	4	1	2	3	4
	463	391	351	378	334	296	302	317
	472	427	356	390	343	310	316	329
	493	433	384	407	358	317	313	347
	491	451	393	413	374	332	305	358
	482	406	332	409	365	285	297	301
Ind. Average	480.2	421.6	363.2	399.4	354.8	308	306.6	330.4
Group Average	416.1				324.95
	TrkB
	Control				Elp1 CKO
	1	2	3	4	1	2	3	4
	107	109	90	83	117	92	88	104
	115	101	98	90	113	102	95	105
	99	94	107	102	110	93	103	113
	96	85	119	96	96	82	102	99
	106	82	101	87	101	77	92	97
Ind. Average	104.6	94.2	103	91.6	107.4	89.2	96	103.6
Group Average	98.35				99.05
	TrkC
	Control				Elp1 CKO
	1	2	3	4	1	2	3	4
	173	126	145	154	143	153	148	147
	175	141	158	162	157	161	163	161
	189	153	137	149	168	151	174	169
	196	140	133	138	171	143	172	142
	169	135	129	129	152	134	157	129
Ind. Average	180.4	139	140.4	146.4	158.2	148.4	162.8	149.6
Group Average	151.55				154.75
