# Supplementary material for: Loss of Elp1 disrupts trigeminal ganglion neurodevelopment in a model of familial dysautonomia
Source: eLife. 2022 Jun 17;11:e71455. doi: 10.7554/eLife.71455 (PMC9273214; doi:10.7554/eLife.71455)
Supplement: Figure 6—source data 1. [file elife-71455-fig6-data1.xlsx]

## Sheet: E10.5
TrkA	#Trk+ Neurons	#Trk+/Six1+	% of Trk+ also Six1+	Ind. Averages		TrkB	#Trk+ Neurons	#Trk+/Six1+	% of Trk+ also Six1+	Ind. Averages		TrkC	#Trk+ Neurons	#Trk+/Six1+	% of Trk+ also Six1+	Ind. Averages
1a	53	47	88.6792			1a	50	39	78			1a	86	79	91.8605
1b	46	41	89.1304			1b	62	45	72.5806			1b	98	92	93.8776
1c	54	49	90.7407			1c	68	46	67.6471			1c	101	97	96.0396
1d	57	51	89.4737	89.506		1d	57	42	73.6842	72.978		1d	89	83	93.2584	93.759
2a	41	39	95.122			2a	56	43	76.7857			2a	102	94	92.1569
2b	49	41	83.6735			2b	52	41	78.8462			2b	104	89	85.5769
2c	51	44	86.2745			2c	49	40	81.6327			2c	93	85	91.3978
2d	43	38	88.3721	88.3605		2d	61	54	88.5246	81.4473		2d	111	107	96.3964	91.382
3a	56	49	87.5			3a	72	49	68.0556			3a	89	82	92.1348
3b	48	42	87.5			3b	68	57	83.8235			3b	86	79	91.8605
3c	52	47	90.3846			3c	54	47	87.037			3c	94	84	89.3617
3d	51	45	88.2353	88.405		3d	65	55	84.6154	80.8829		3d	106	93	87.7358	90.2732
				88.7572						78.436						91.8047

## Sheet: E11.5
TrkA	#Trk+ Neurons	#Trk+/Six1+	% of Trk+ also Six1+	Ind. Averages		TrkB	#Trk+ Neurons	#Trk+/Six1+	% of Trk+ also Six1+	Ind. Averages		TrkC	#Trk+ Neurons	#Trk+/Six1+	% of Trk+ also Six1+	Ind. Averages
1a	357	311	87.1148			1a	236	16	6.77966			1a	322	61	18.9441
1b	302	272	90.0662			1b	220	21	9.54545			1b	312	57	18.2692
1c	296	243	82.0946			1c	213	9	4.22535			1c	297	48	16.1616
1d	324	289	89.1975			1d	224	13	5.80357			1d	289	52	17.9931
1e	288	262	90.9722	87.8891		1e	219	14	6.39269	6.54935		1e	302	67	22.1854	18.7107
2a	302	276	91.3907			2a	214	16	7.47664			2a	294	58	19.7279
2b	276	233	84.4203			2b	211	14	6.63507			2b	289	47	16.263
2c	281	241	85.7651			2c	198	10	5.05051			2c	299	55	18.3946
2d	306	257	83.9869			2d	221	13	5.88235			2d	306	61	19.9346
2e	268	214	79.8507	85.0828		2e	201	14	6.96517	6.40195		2e	278	49	17.6259	18.3892
3a	327	271	82.8746			3a	199	12	6.03015			3a	315	61	19.3651
3b	330	268	81.2121			3b	226	15	6.63717			3b	305	59	19.3443
3c	312	273	87.5			3c	207	20	9.66184			3c	286	52	18.1818
3d	291	251	86.2543			3d	221	17	7.69231			3d	321	66	20.5607
3e	301	262	87.0432	84.9768		3e	194	13	6.70103	7.3445		3e	294	48	16.3265	18.7557
				85.9829						6.76526						18.6185

## Sheet: E12.5
TrkA	#Trk+ Neurons	#Trk+/Six1+	% of Trk+ also Six1+	Ind. Averages		TrkB	#Trk+ Neurons	#Trk+/Six1+	% of Trk+ also Six1+	Ind. Averages		TrkC	#Trk+ Neurons	#Trk+/Six1+	% of Trk+ also Six1+	Ind. Averages
1a	190	97	51.0526			1a	25	1	4			1a	34	4	11.7647
1b	121	67	55.3719			1b	24	0	0			1b	20	3	15
1c	122	64	52.459			1c	42	1	2.38095			1c	39	2	5.12821
1d	112	51	45.5357			1d	24	1	4.16667			1d	41	2	4.87805
1e	100	53	53	51.4839		1e	27	0	0	2.10952		1e	38	1	2.63158	7.88051
2a	117	52	44.4444			2a	7	0	0			2a	52	2	3.84615
2b	115	54	46.9565			2b	13	1	7.69231			2b	35	2	5.71429
2c	113	61	53.9823			2c	21	1	4.7619			2c	42	3	7.14286
2d	146	72	49.3151			2d	11	0	0			2d	31	1	3.22581
2e	134	65	48.5075	48.6412		2e	9	0	0	2.49084		2e	28	2	7.14286	5.41439
3a	129	74	57.3643			3a	23	0	0			3a	34	3	8.82353
3b	142	67	47.1831			3b	21	0	0			3b	46	4	8.69565
3c	112	61	54.4643			3c	18	0	0			3c	29	1	3.44828
3d	124	64	51.6129			3d	20	0	0			3d	37	3	8.10811
3e	120	57	47.5	51.6249		3e	32	1	3.125	0.625		3e			6.825	7.18011
				50.5833						1.74179						6.825
