# Supplementary material for: Loss of Elp1 disrupts trigeminal ganglion neurodevelopment in a model of familial dysautonomia
Source: eLife. 2022 Jun 17;11:e71455. doi: 10.7554/eLife.71455 (PMC9273214; doi:10.7554/eLife.71455)
Supplement: Figure 7—source data 1. [file elife-71455-fig7-data1.xlsx]

## Sheet: E10.5 Sox10 GFP
	Sox10+/Wnt1+	Sox10+/Wnt1-	Sox10-/Wnt1+
% of Total	87.6079	7.51459	4.87748	All Total	Sox10 Total	%ofSox10 cells that are Wnt1+
TOTAL	3754	322	209	4285	4076	92.1001
1a	183	8	6
1b	156	12	10
1c	191	22	11
1d	224	17	10
1e	179	23	18
1f	218	21	16
2a	234	14	6
2b	238	18	7
2c	258	24	12
2d	282	35	1
2e	247	21	5
2f	236	25	36
3a	241	16	44
3b	144	6	0
3c	171	10	0
3d	112	8	0
3e	189	14	6
3f	251	28	21

## Sheet: E10.5 Six1 GFP
Image	Six1+/Wnt1+	Six1 Total	%ofSix1 cells that are Wnt1+
1a	11	128	8.59375
1b	19	180	10.5556
1c	32	226	14.1593
1d	24	220	10.9091
1e	29	158	18.3544
1f	31	240	12.9167
2a	23	186	12.3656
2b	17	203	8.37438
2c	19	176	10.7955
2d	24	207	11.5942
2e	31	227	13.6564
2f	29	224	12.9464
3a	16	193	8.29016
3b	29	199	14.5729
3c	19	213	8.92019
3d	26	197	13.198
3e	38	236	16.1017
3f	23	211	10.9005
		average	12.1355

## Sheet: E12.5 Six1 GFP
Image	Six1+/Wnt1+	Six1 Total	%ofSix1 cells that are Wnt1+
1a	230	252	91.2698
1b	174	178	97.7528
1c	150	163	92.0245
1d	142	154	92.2078
1e	203	221	91.8552
1f	140	163	85.8896
2a	221	242	91.3223
2b	210	234	89.7436
2c	225	247	91.0931
2d	211	223	94.6188
2e	192	214	89.7196
2f	216	231	93.5065
3a	174	198	87.8788
3b	203	212	95.7547
3c	146	167	87.4251
3d	157	173	90.7514
3e	209	222	94.1441
3f	176	189	93.1217
		average	91.6711
