# Supplementary material for: Loss of Elp1 disrupts trigeminal ganglion neurodevelopment in a model of familial dysautonomia
Source: eLife. 2022 Jun 17;11:e71455. doi: 10.7554/eLife.71455 (PMC9273214; doi:10.7554/eLife.71455)
Supplement: Figure 8—source data 1. [file elife-71455-fig8-data1.xlsx]

## Sheet: Wnt1Cre E15.5 Trks RFP quants
Wnt1-Cre@E15.5 Trks/RFP quants
Image	#TrkA Neurons	#TrkA/RFP neurons	% of TrkA+ also RFP+		#TrkB Neurons	#TrkB/RFP neurons	% of TrkB+ also RFP+		#TrkC Neurons	#TrkC/RFP neurons	% of TrkC+ also RFP+
1a	218	66	30.2752		42	31	73.8095		65	51	78.4615
1b	261	74	28.3525		45	32	71.1111		68	54	79.4118
1c	206	67	32.5243		25	19	76		72	51	70.8333
1d	227	71	31.2775		37	29	78.3784		66	49	74.2424
2a	304	64	21.0526		53	41	77.3585		61	49	80.3279
2b	257	39	15.1751		46	39	84.7826		72	58	80.5556
2c	195	33	16.9231		47	33	70.2128		64	54	84.375
2d	219	37	16.895		42	34	80.9524		59	45	76.2712
3a	215	53	24.6512		44	38	86.3636		53	43	81.1321
3b	256	53	20.7031		41	28	68.2927		49	38	77.551
3c	278	69	24.8201		31	25	80.6452		54	45	83.3333
3d	237	71	29.9578		42	34	80.9524		60	46	76.6667
Average	239.417	58.0833	24.384		41.25	31.9167	77.4049		61.9167	48.5833	78.5968
