# Supplementary material for: Loss of Elp1 disrupts trigeminal ganglion neurodevelopment in a model of familial dysautonomia
Source: eLife. 2022 Jun 17;11:e71455. doi: 10.7554/eLife.71455 (PMC9273214; doi:10.7554/eLife.71455)
Supplement: Figure 9—source data 1. [file elife-71455-fig9-data1.xlsx]

## Sheet: TUNEL Fluorescence
	Control				Elp1 CKO
	1	2	3		1	2	3
	7858.83	6542.69	4055.04		6611.27	11275.6	7397.12
	7684.32	7535.85	4867.1		8260.95	10327	6892.24
	7224.43	8246.54	4666.35		8219.93	5400.18	5641.52
	6891.55	8765.13	5211.14		8066.84	6671.61	5494.16
	6111.27	8978.29	5879.65		11669.5	5520.14	6407.6
	5490.99	6152.84	6362.43		8066.84	6541.29	7472.4
	7016.62	8242.35	6700.87		5494.56	6242.33	13916.6
	7227.21	7115.8	6499.73		7073	7135.49	11766.8
	7014.26	4496.16	7488.59		7049.17	8626.56	5300.48
	7513.19	6657.1	8215.36		8698.83	9814.2	5805.12
	4472.52	8362.31	7873.5		9716.11	10139.5	15163.8
	7845.37	8151.33	8139.98		9804.37	10846.8	4642.56
	5470.71	7973.13	8688.5		10084.5	9088.92	4380.64
	8712.56	7977.15	9216.28		10372.6	10470.1	7177.84
	8686.52	5482.79	8413.6		5492.19	9914.11	5891.28
	7475.02	7481.81	8049.48		5482.49	10438.8	13566.6
	8186.31		6856.95			12087.8	11208.3
	6449.96		8970.15			14672.3	10322.8
						11489.7	13702.7
						9362.03
Ind. Averages	7073.98	7385.08	7008.59		8135.2	9303.22	8534.24
Group Averages	7155.88				8657.56
